# Supplementary material for: Contribution of HONO to the atmospheric oxidation capacity in an industrial zone in the Yangtze River Delta region of China
Source: Copernicus journal article supplement (doi:10.5194/acp-2019-944), 2019-12-09
Supplement: Supplementary file 1 [file acp-2019-944-supplement.pdf]

1 **Supporting Information:**

2 **Contribution of HONO to the atmospheric oxidation capacity at an industrial zone**  
3 **in the Yangtze River Delta region of China**

4 Jun Zheng<sup>1\*</sup>, Xiaowen Shi<sup>1</sup>, Yan Ma<sup>1,2</sup>, Xinrong Ren<sup>3,4,5</sup>, Halim Jabbour<sup>1</sup>, Yiwei Diao<sup>1,4</sup>, Weiwei Wang<sup>4</sup>, Yifeng  
5 Ge<sup>1</sup>, Yuchan Zhang<sup>1</sup>, and Wenhui Zhu<sup>1</sup>

6 <sup>1</sup>Collaborative Innovation Center of Atmospheric Environment and Equipment Technology, Nanjing University  
7 of Information Science & Technology, Nanjing 210044, China

8 <sup>2</sup>NUIST Reading Academy, Nanjing University of Information Science & Technology, Nanjing 210044, China

9 <sup>3</sup>Air Resources Laboratory, National Oceanic and Atmospheric Administration, College Park, Maryland, USA

10 <sup>4</sup>Department of Atmospheric and Oceanic Science, University of Maryland, College Park, MD 20742, USA

11 <sup>5</sup>Cooperative Institute for Climate and Satellites, University of Maryland, College Park, Maryland, USA

12 <sup>6</sup>Key Laboratory for Aerosol-Cloud-Precipitation of China Meteorological Administration, Department of  
13 Atmospheric Physics, Nanjing University of Information Science and Technology, Nanjing 210044, China

14

15 *Correspondence to: Dr. Jun Zheng (zheng.jun@nuist.edu.cn)*

16 *Address: School of Environmental Science and Engineering, Nanjing University of Information*

17 *Science & Technology, Nanjing 210044, China*

18 *Tel.: +86-18251919852*

19 *Fax: +86-25-58731090*

20 Reaction scheme of conversion of HONO into Azo dye before being detected:

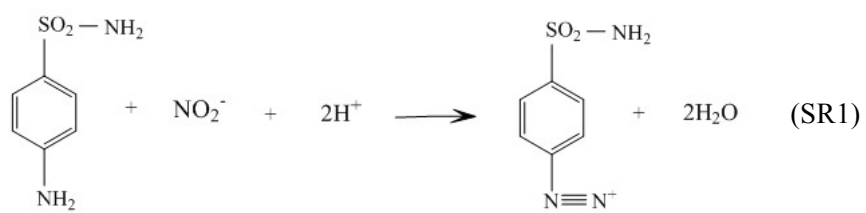

(SA)

(Diazonium)

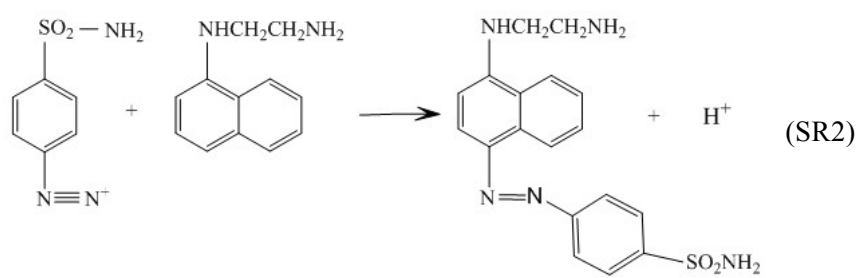

(NED)

(Azo dye)
